# Supplementary material
Source: PubMed Central journal article supplement (PMC6306102)
Supplement: ahdb-11-353-s1.pdf [file ahdb-11-353-s1.pdf]

## **Appendix**

### **Computed Tomography Colonography Less Costly Than Colonoscopy for Colorectal Cancer Screening of Commercially Insured Patients**

Tia Goss Sawhney, DrPH, FSA; Bruce S. Pyenson, FSA, MAAA; David Rotter, PhD; Michele Berrios; Judy Yee, MD

This Appendix has not been edited and is provided as supplemental materials for this article, which was published in *American Health & Drug Benefits* in October 2018.

**Supplemental Table A.1. HCPCS codes of optical colonoscopy and related CT imaging.**

| <b>Category</b>            | <b>Subcategory</b>     | <b>Code Type</b>    |                                  |
|----------------------------|------------------------|---------------------|----------------------------------|
|                            |                        | <b><sup>a</sup></b> | <b>Codes</b>                     |
| CT<br>Colonography         | Screening              | HCPCS               | 74263                            |
|                            | Diagnostic             | HCPCS               | 74261, 74262                     |
| Optical<br>Colonoscopy     | Sometimes              | HCPCS               | 45378-45382, 45384-45386, 45388- |
|                            | Screening <sup>b</sup> |                     | 45393, 45398                     |
|                            | Screening              | ICD-10 Dx           | Z12.11                           |
|                            | Screening              | HCPCS               | G0105, G0120, G0121              |
| Incomplete OC              | Screening <sup>c</sup> | HCPCS<br>modifier   | 52, 53, 73, 74                   |
| Upper<br>Endoscopy         |                        | HCPCS               | 43235-43255                      |
| Abdominal CT               | Diagnostic             | HCPCS               | 74150                            |
| Mammography                | Screening              | HCPCS               | G0202                            |
| Complications <sup>d</sup> | Abdominal Pain         | ICD-10 Dx           | R100-R1033, R1084, R109          |
|                            | Anemia                 | ICD-10 Dx           | D500, D62, D649                  |

|                  |           |                                                   |
|------------------|-----------|---------------------------------------------------|
| Anesthesia       | ICD-10 Dx | I97111, I97121, I97131, I97191,                   |
| Complications    |           | I97711, I97791, I9788,<br>I9789, T882XXA, T8851XA |
| Aspiration       | ICD-10 Dx | J690                                              |
| Pneumonia        |           |                                                   |
| Colitis          | ICD-10 Dx | K5150-K51919, K523, K52831-K529,<br>K5931         |
| Diverticulitis   | ICD-10 Dx | K5720, K5732, K5780, K5792                        |
| Gastrointestinal | ICD-10 Dx | K9161, K91840, K91870, K91872,                    |
| Bleeding         |           | K921                                              |
| Infection        | ICD-10 Dx | I38, I39, R7881                                   |
| Myocardial       | ICD-10 Dx | I2101-I228, I2510                                 |
| Infarction       |           |                                                   |
| Other Pneumonia  | ICD-10 Dx | J188, J189                                        |
| Perforations     | ICD-10 Dx | K631, K9171, T888XXA                              |
| Procedure        | ICD-10 Dx | Y620, Y628, Y629, Y848                            |
| Complications    |           |                                                   |
| Stroke           | ICD-10 Dx | I610-I619, I6300-I639                             |

---

|           |                  |                  |
|-----------|------------------|------------------|
| Laxatives | GPI <sup>e</sup> | 46xxxxxxxxxxxxxx |
|-----------|------------------|------------------|

---

<sup>a</sup> HCPCS codes are the property of the American Medical Association.

<sup>b</sup> If accompanied by an ICD-10 diagnosis code of Z12.11 (screen for malignant neoplasm-colon), a procedure modifier code of PT (colorectal cancer screening test, converted to a diagnostic test or other procedure), or a procedure modifier code of 33 (preventative service).

<sup>c</sup> An OC screening is designated as incomplete if accompanied by the listed procedure modifier code.

<sup>d</sup> Diagnosis codes developed by Milliman

<sup>e</sup> GPI codes are the property of Wolters Kluwer.

**Supplemental Table A.2a. Years until next OC screen.**

| OC Colonoscopy Result                          | Prevalence        |            |
|------------------------------------------------|-------------------|------------|
|                                                | Rate <sup>a</sup> | Years      |
| No Adenoma                                     | 75.4%             | 10         |
| Non-Advanced Adenoma                           | 16.8%             | 5          |
| Advanced Adenoma or<br>>3 Non-Advanced Adenoma | 7.9%              | 3          |
| <b>Recommended Years</b>                       | <b>100.0%</b>     | <b>8.6</b> |
| <b>Observed Mean Years <sup>b</sup></b>        |                   | <b>6.0</b> |

**Supplemental Table A.2b. Years until next screen for CTC <sup>c</sup>.**

| CT Colonography Result                    | Count        | Prevalence Rate | Guideline Recommendation      | Guideline        |
|-------------------------------------------|--------------|-----------------|-------------------------------|------------------|
|                                           |              |                 |                               | Time To Rescreen |
| Normal / Hyperplastic Only ( $\leq 5$ mm) | 5,800        | 85.7%           | Follow-up CTC in 5 years      | 5                |
| Low Risk Adenoma (6-9 mm)                 | 579          | 8.6%            | OC, then follow-up in 5 years | 5                |
| High Risk Adenoma ( $\geq 10$ mm)         | 390          | 5.8%            | OC, then follow-up in 3 years | 3                |
| <b>Overall</b>                            | <b>6,769</b> | <b>100.0%</b>   |                               | <b>4.9</b>       |

<sup>a</sup> Observed prevalence rates are derived from rates presented in Schoen RE, et al. (2010) Utilization of surveillance colonoscopy in community practice. Gastroenterology. 138(1):73. Kruse GR, et al. (2015) Overuse of colonoscopy for colorectal cancer screening and surveillance. J Gen Intern Med. 30:277-283. Murphy et al. (2016) Underuse and overuse of colonoscopy for repeat screening and surveillance in the Veterans Health Administration. Clin Gastroenterol Hepatol. 14(3) 436-444.

<sup>b</sup> Observed mean years are derived from Kruse GR, et al. (2015) Overuse of colonoscopy for colorectal cancer screening and surveillance. J Gen Intern Med. 30:277-283.

<sup>c</sup> Observed prevalence rates for CTC are derived from Pickhardt PJ, et al. (2016) Colorectal findings at repeat CT colonography screening after initial CT colonography screening negative for polyps larger than 5mm. Radiology 282:139-48.
